# Supplementary material for: Sequential incorporation of metallic cations (Cd2+ and Hg2+) and N-octylamine into titanium phosphate nanoparticles and their subsequent release in acid media
Source: Royal Society of Chemistry journal article supplement (doi:10.1039/c7dt00702g), 2017-01-01
Supplement: c7dt00702g1.pdf [file c7dt00702g1.pdf]

## **SUPPORTING INFORMATION**

### **Sequential incorporation of metallic cations ( $\text{Cd}^{2+}$ and $\text{Hg}^{2+}$ ) and N-Octylamine into Titanium Phosphate Nanoparticles and their subsequent release in acid media**

*Javier Carrasco-Rodríguez<sup>a</sup>, Daniel Martín-Yerga<sup>b</sup>, Leoncio Garrido<sup>c</sup>, Agustín Costa-García<sup>b</sup>,  
Francisco J. García Alonso<sup>\*a</sup>.*

a) Nanobioanalysis group, Department of Inorganic and Organic Chemistry, University of Oviedo,  
33006, Oviedo (Spain)

b) Nanobioanalysis Group, Department of Physical and Analytical Chemistry, University of Oviedo,  
33006, Oviedo (Spain)

c) Departamento de Química Física, Instituto de Ciencia y Tecnología de Polímeros, ICTP-CSIC,  
Juan de la Cierva 3, 28006 Madrid, Spain

\* Corresponding author: Francisco J. García Alonso, [fjga@uniovi.es](mailto:fjga@uniovi.es)

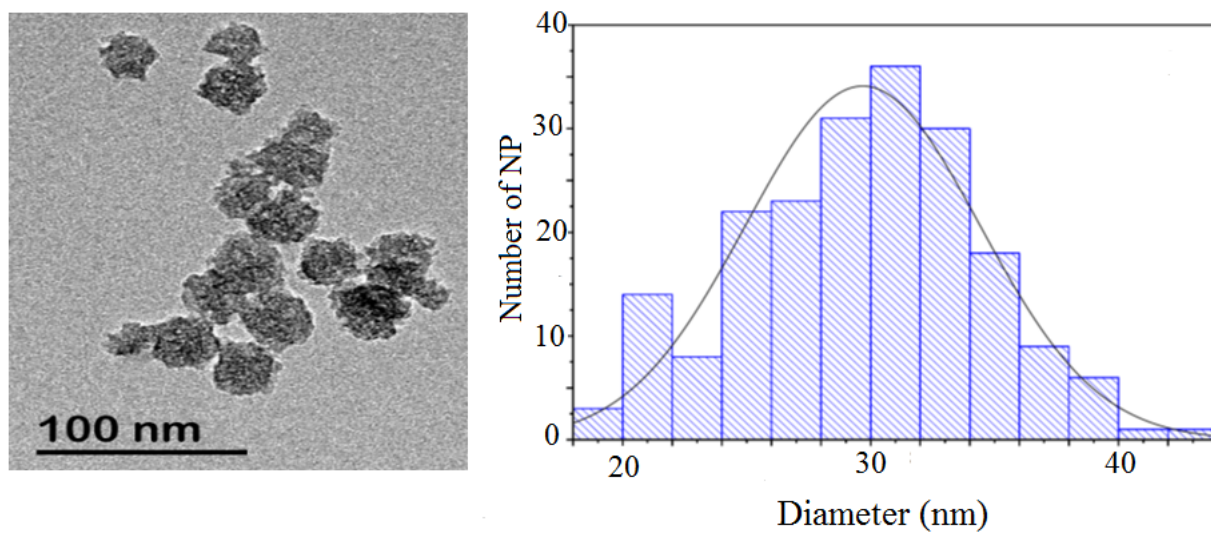

**Figure S-1** TEM Micrographs (left) and Size distribution (right) of TPNP.

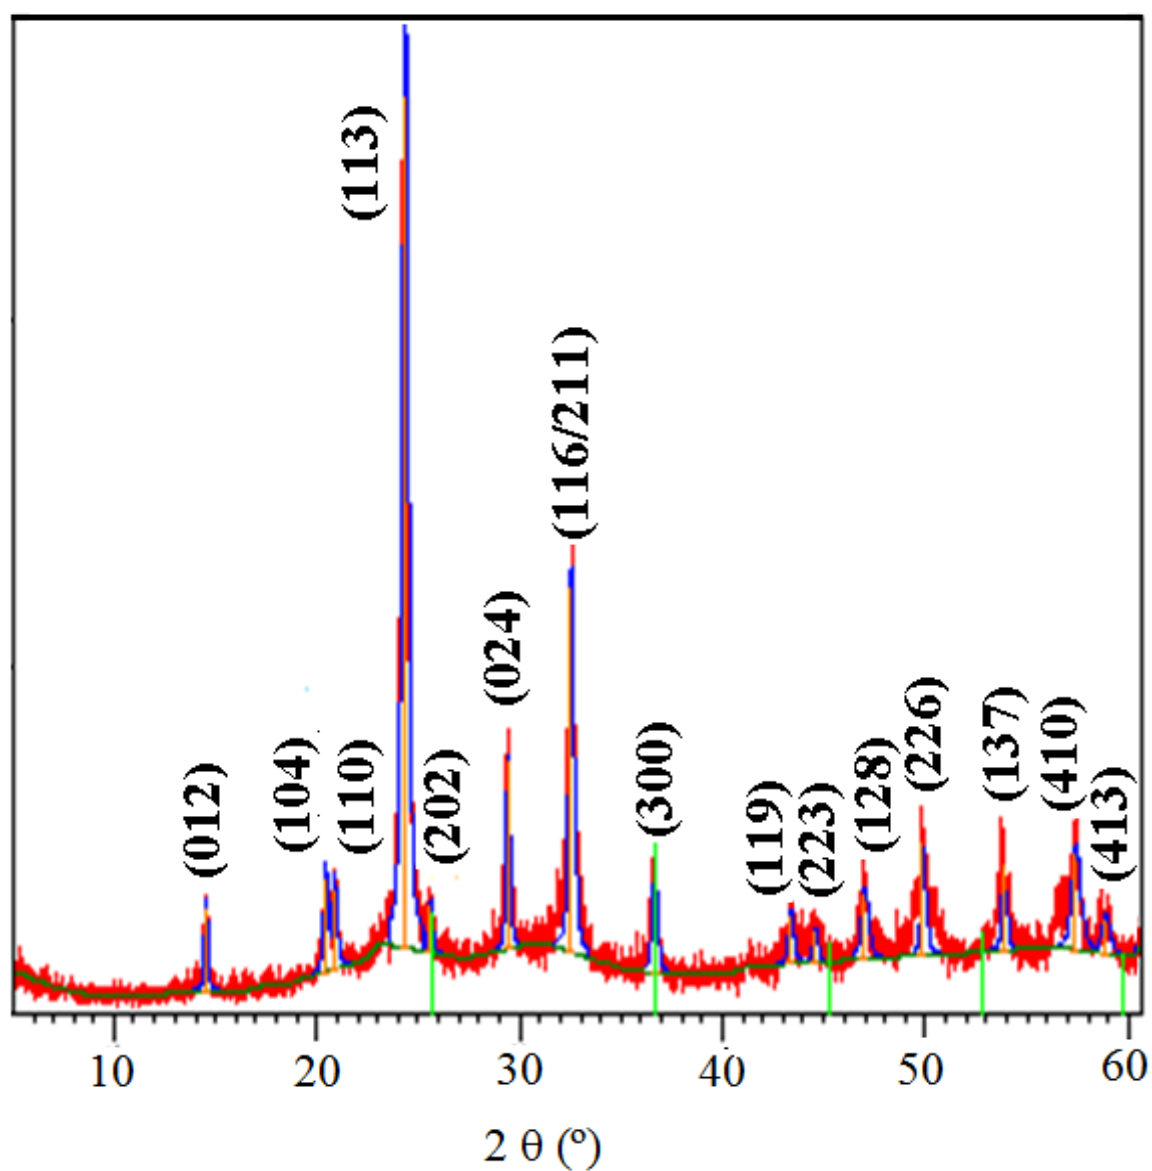

**Figure S-2** XRD pattern of TPNP.

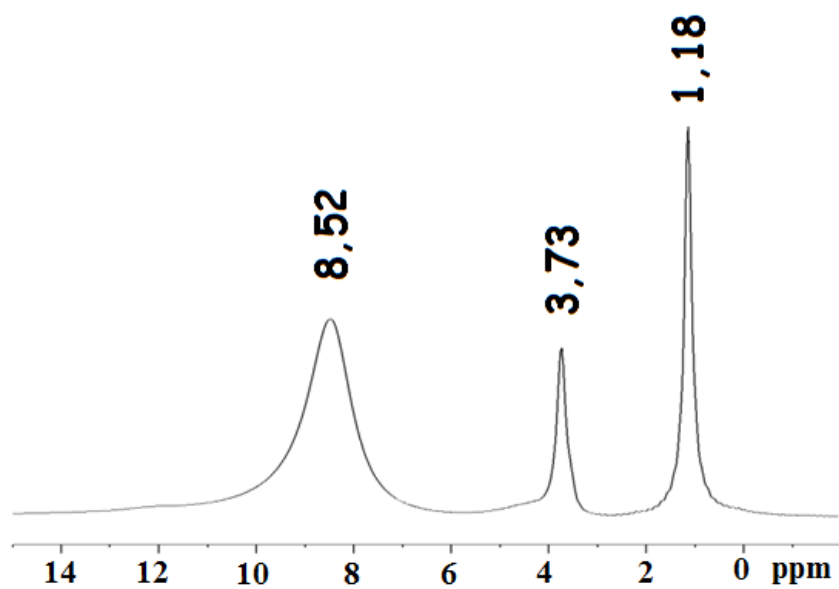

Figure S-3  $^1\text{H}$  MAS NMR of TPNP.

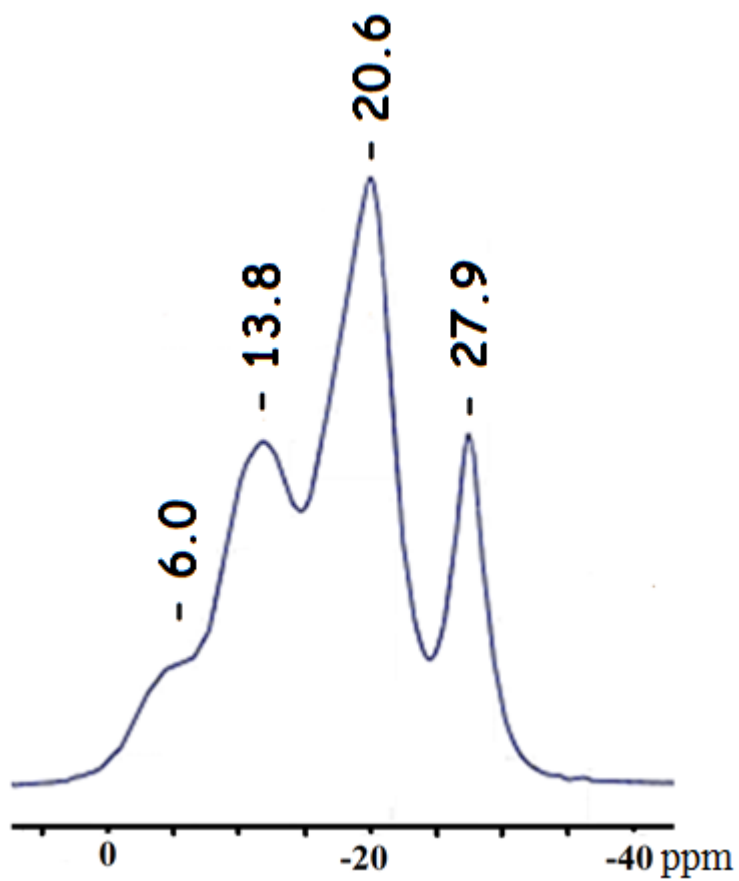

Figure S-4  $^{31}\text{P}$  CP/MAS NMR spectrum of TPNP.

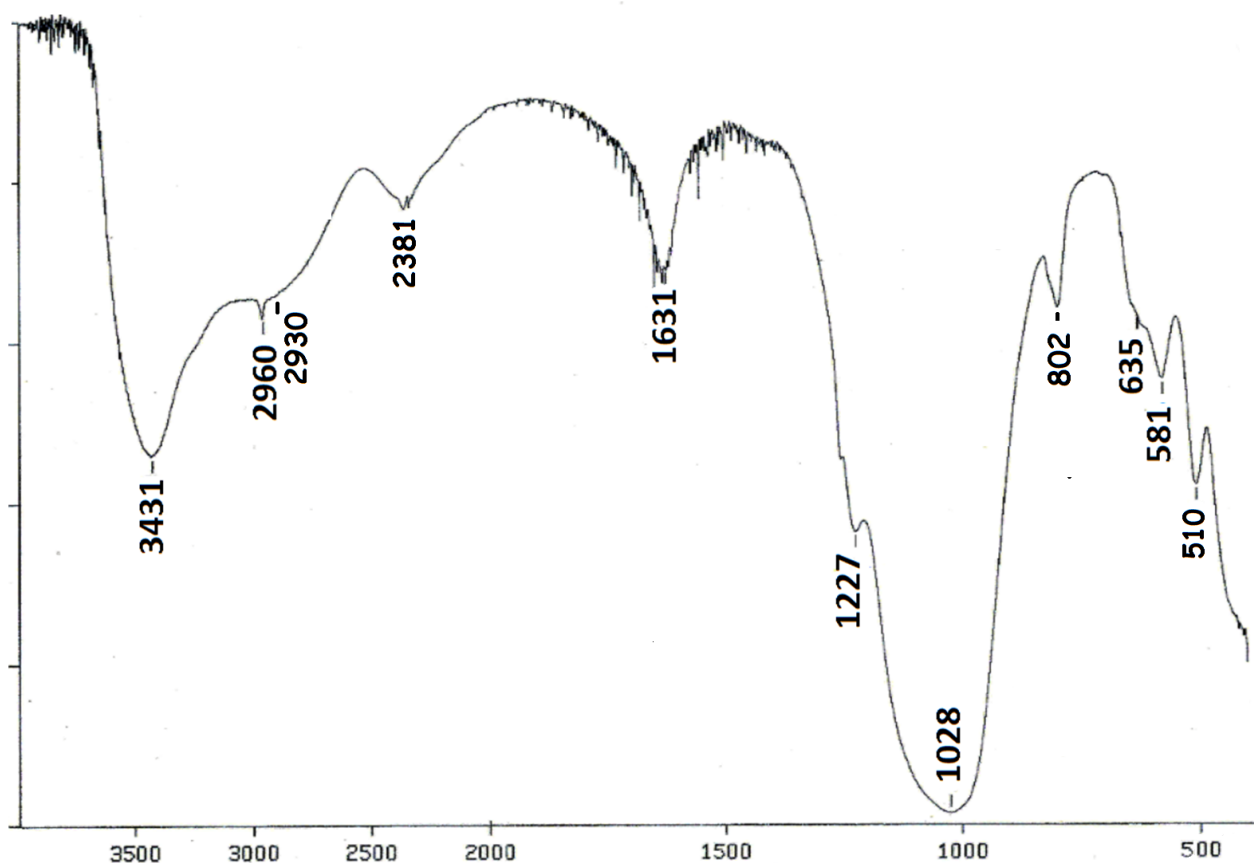

**Figure S-5** Infrared spectrum of TPNP (4000-400  $\text{cm}^{-1}$ ).

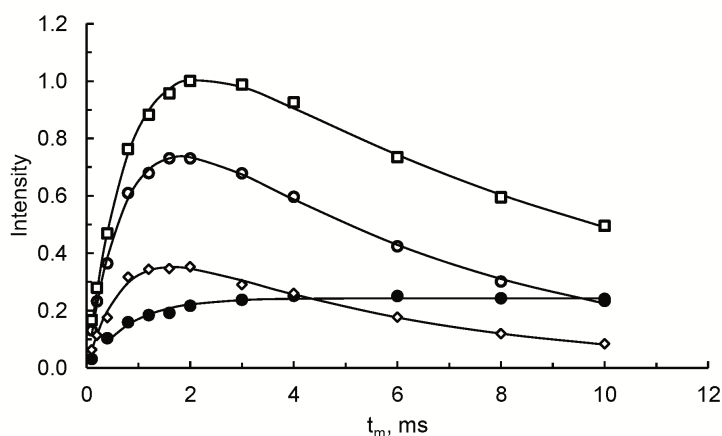

**Figure S-6.**  $^1\text{H} \rightarrow ^{31}\text{P}$  CP kinetics with MAS at 6 kHz in TPNP: (●) -27.9 ppm; (□) -20.6 ppm; (○) -13.8 ppm, and (◇) -6.0 ppm. The fittings use eq.  $I(t) = I_0 \left(1 - \frac{T_{IS}}{T_{1\rho}^I}\right)^{-1} \left[ \exp\left(-\frac{t_m}{T_{1\rho}^I}\right) - \exp\left(-\frac{t_m}{T_{IS}}\right) \right]$  where  $I(t)$  represents the peak intensity,  $I_0$  is the absolute intensity,  $T_{IS}$  is the CP time constant between nuclei  $I$  ( $^1\text{H}$ ) and  $S$  ( $^{31}\text{P}$ ),  $T_{1\rho}^I$  is the spin-lattice relaxation time in the rotating frame of nuclei  $I$  and  $t_m$  is the contact time.

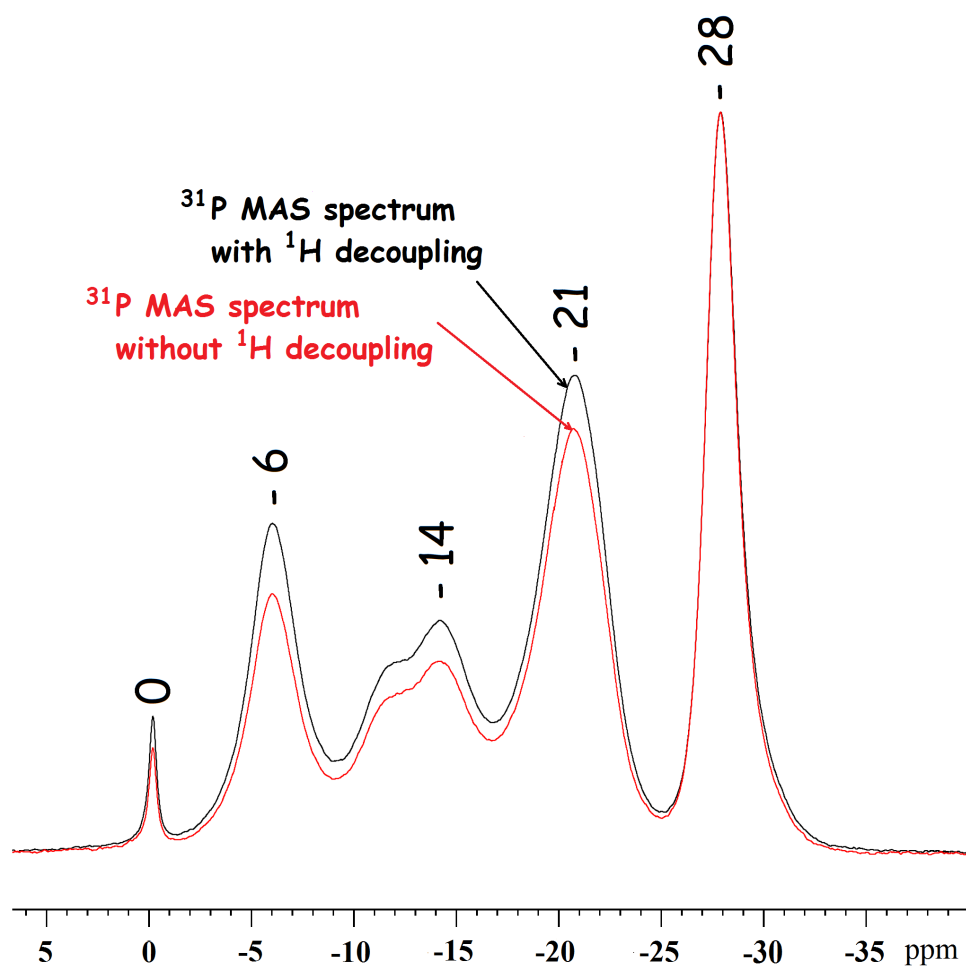

**Figure S-7**  $^{31}\text{P}$  MAS NMR spectra of TPNP, one with  $^1\text{H}$  decoupling (black), the other without  $^1\text{H}$  decoupling (red).

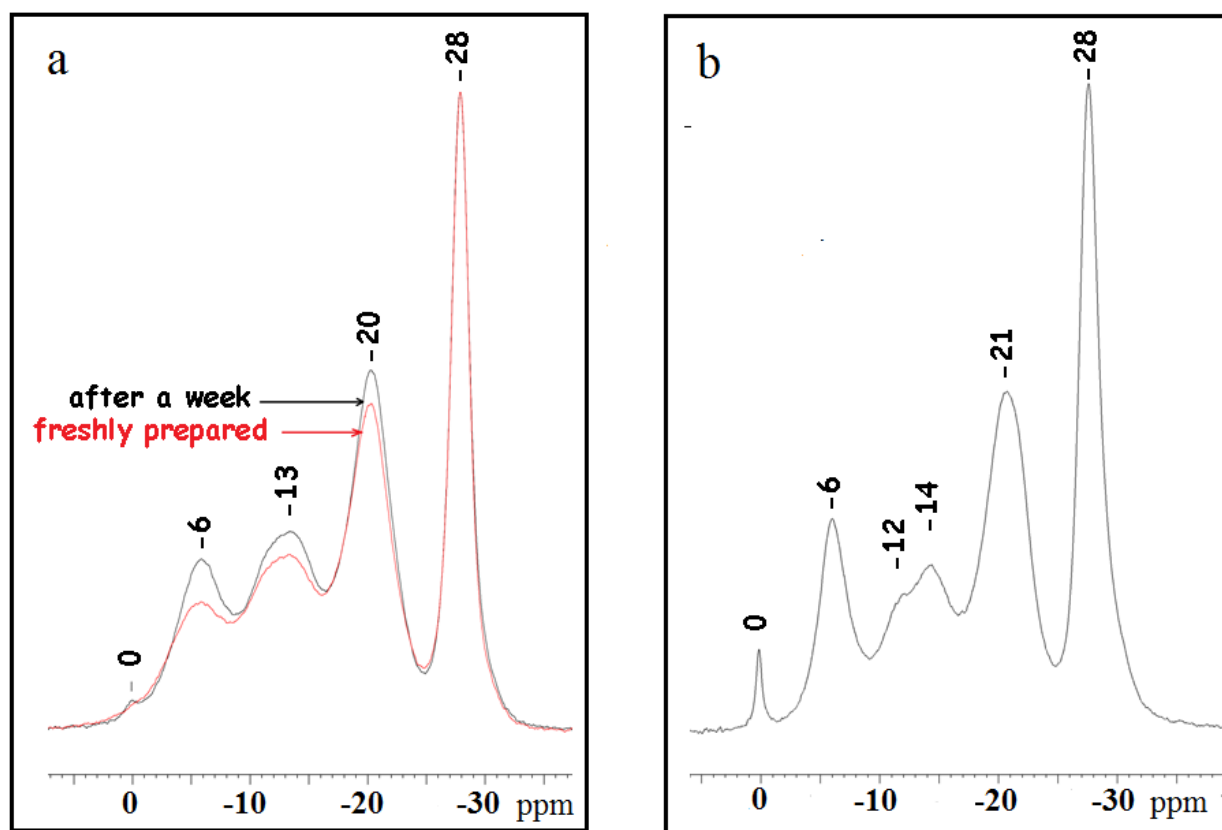

**Figure S-8**  $^{31}\text{P}$  MAS NMR spectrum of TPNP freshly prepared (red) and after a week (black) (a) and after four months (b).

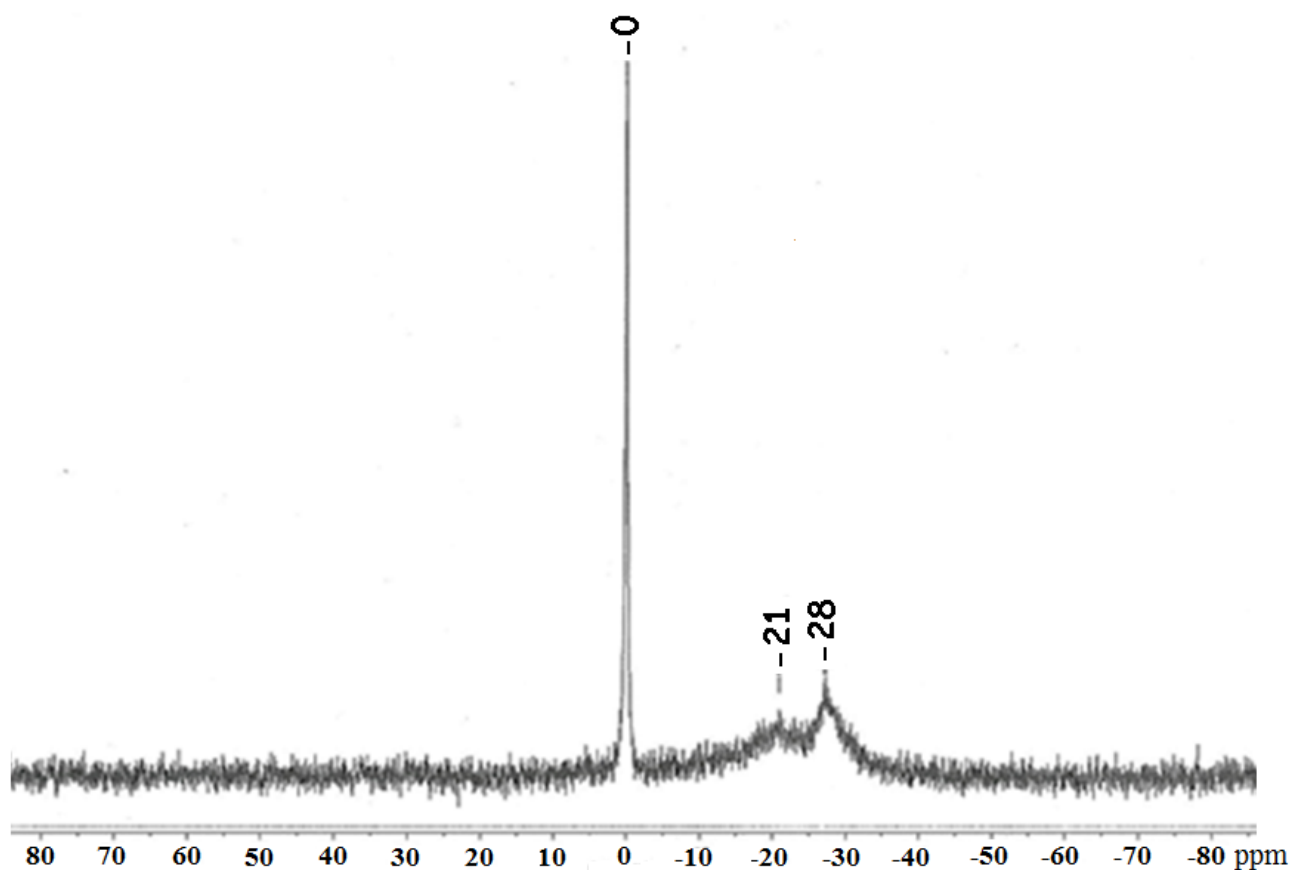

**Figure S-9**  $^{31}\text{P}$  NMR spectrum of TPNP in  $\text{D}_2\text{O}$  after stirring at room temperature the nanoparticles in deuterated water for 10 minutes.

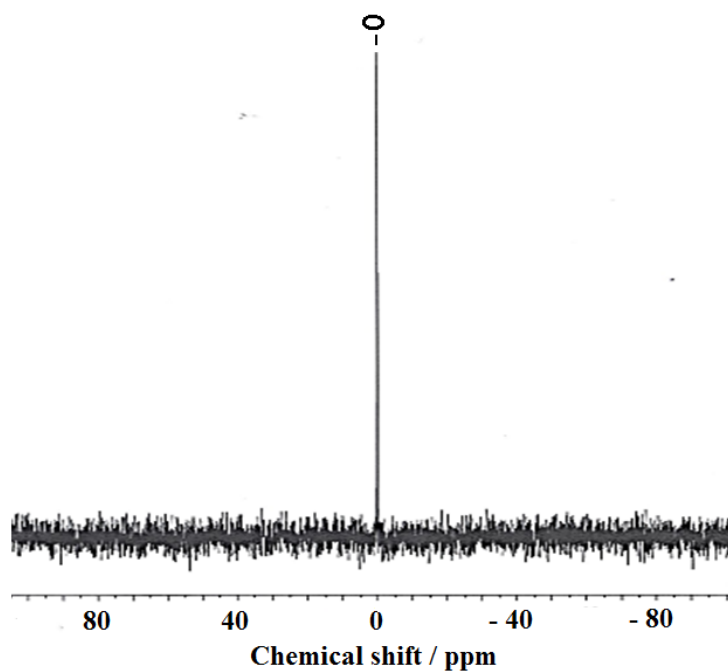

**Figure S-10**  $^{31}\text{P}$  NMR spectrum of the final mixture solution after the reaction between TPNP (40 mg) and  $\text{Cd}(\text{NO}_3)_2$  (0.17 mmol) at  $50^\circ\text{C}$  for 2h. Initially, the titanium phosphate nanoparticles were added to the cadmium salt solution.

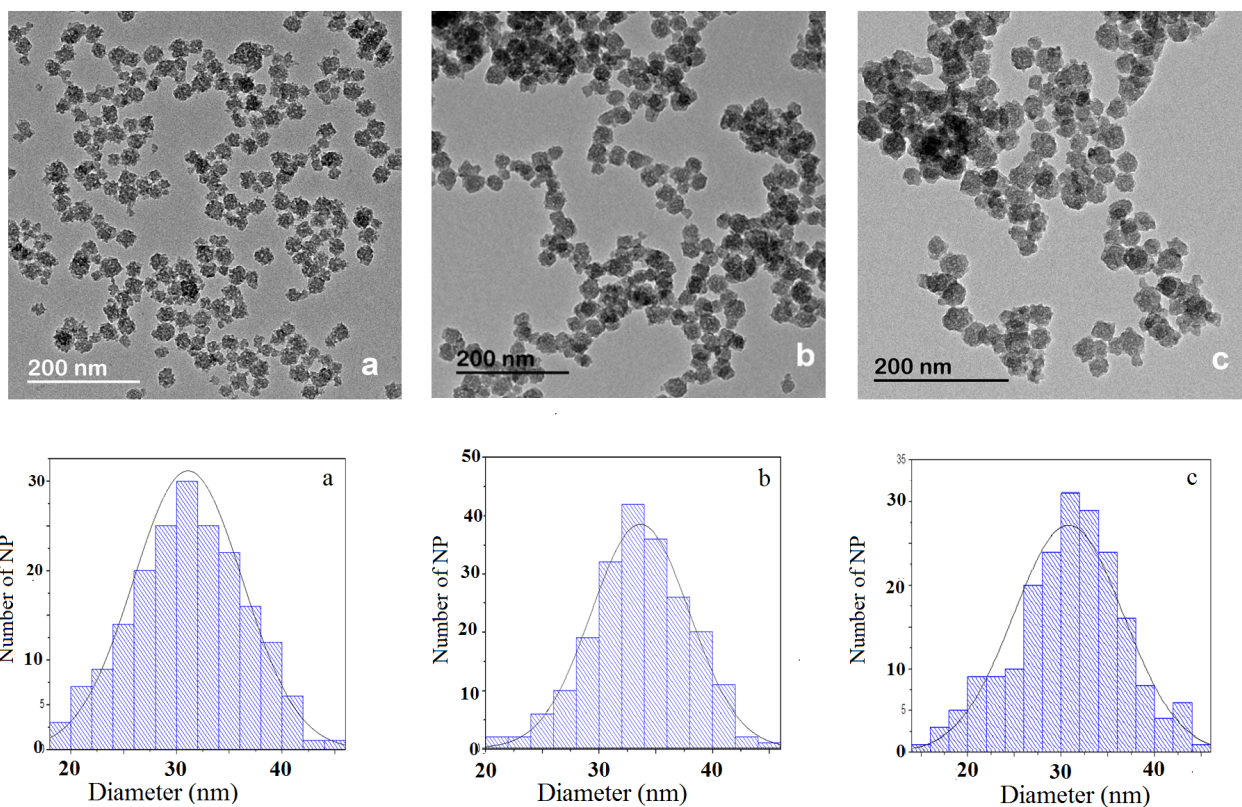

**Figure S-11** TEM Micrographs (top) and Size distribution (bottom) of TPNP-Cd-1(a), TPNP-Cd-2 (b) and TPNP-Cd-3 (c).

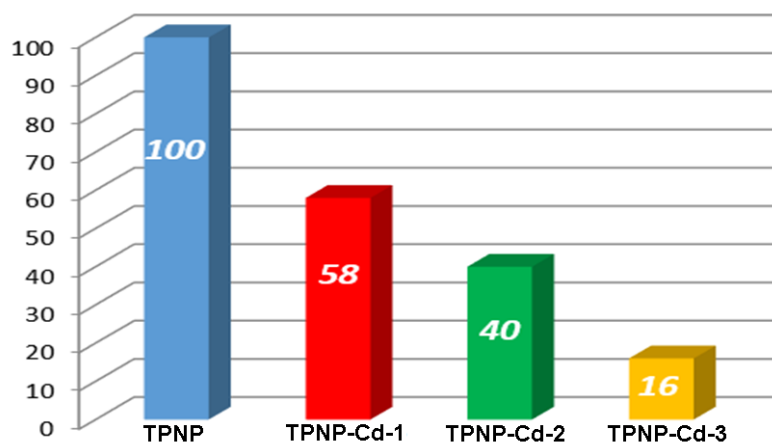

**Figure S-12** Relative area under the fluorescence signal at 720 nm corresponding to TPNP, TPNP-Cd-1, TPNP-Cd-2 and TPNP-Cd-3.



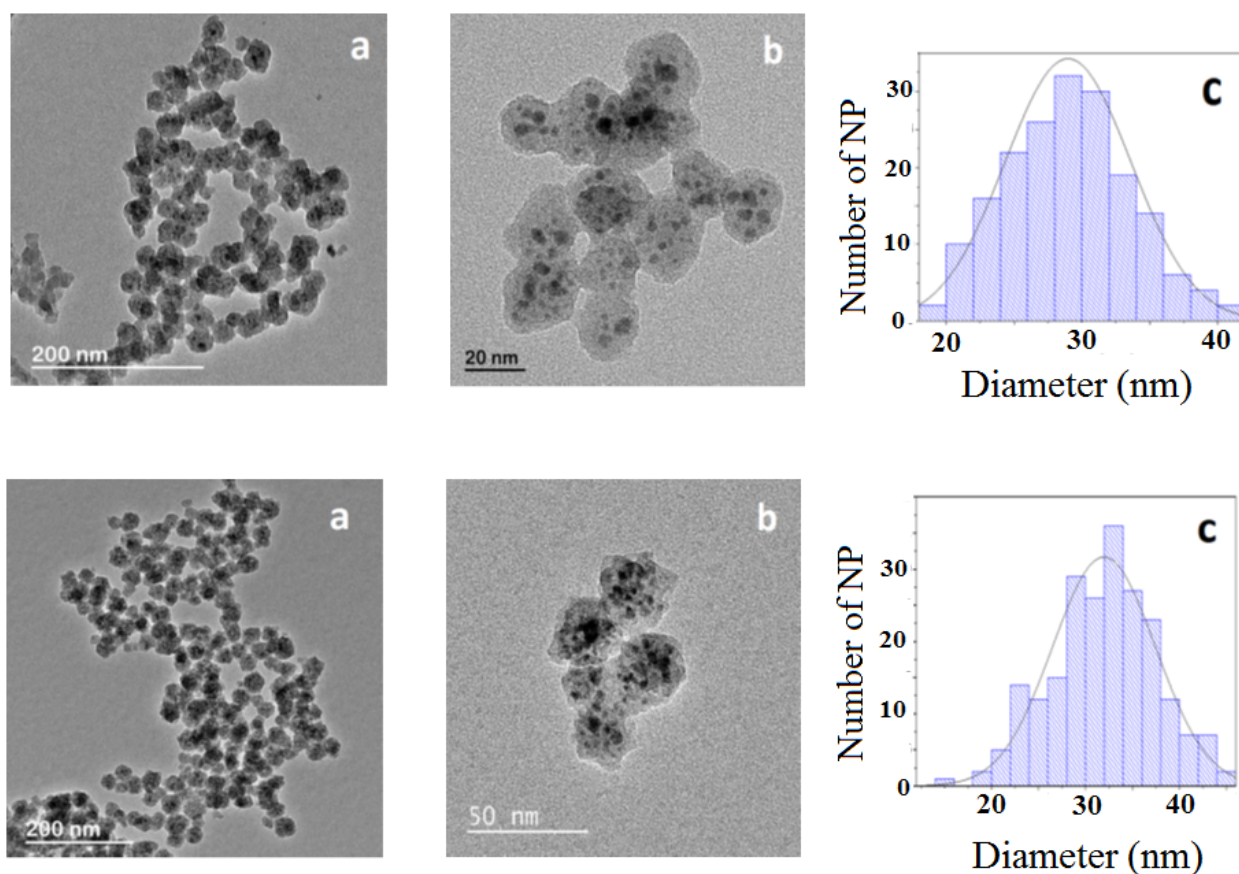

**Figure S-13** Overview (a) and detailed (b) TEM Micrographs and Size distribution (c) of TPNP-Hg-1 (top) and TPNP-Hg-2 (bottom).

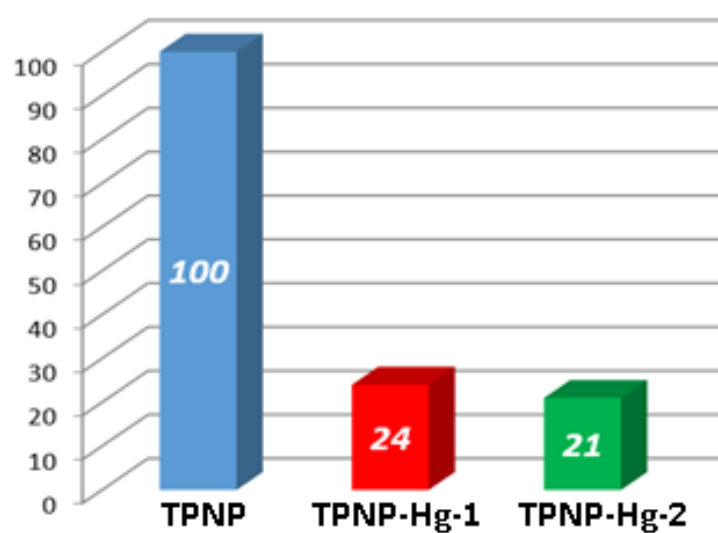

**Figure S-14** Relative area under the fluorescence signal at 720 nm corresponding to TPNP, TPNP-Hg-1 and TPNP-Hg-2.

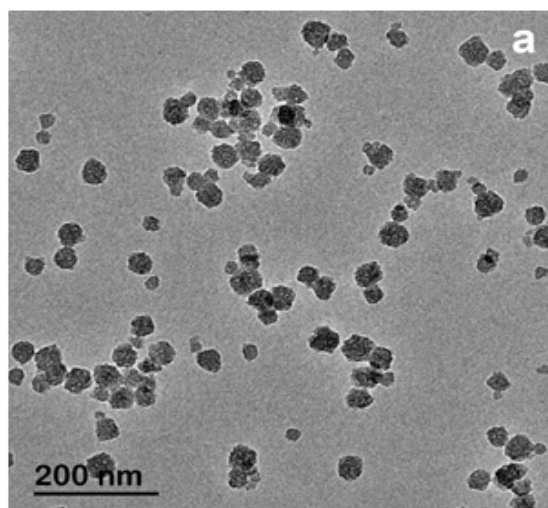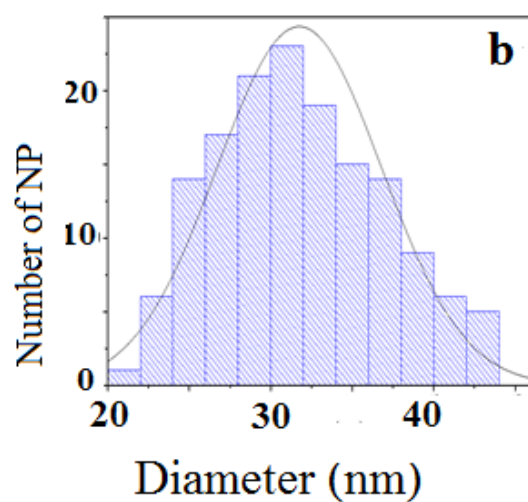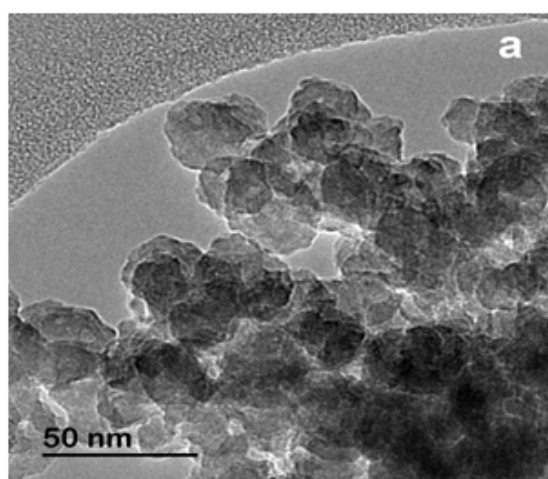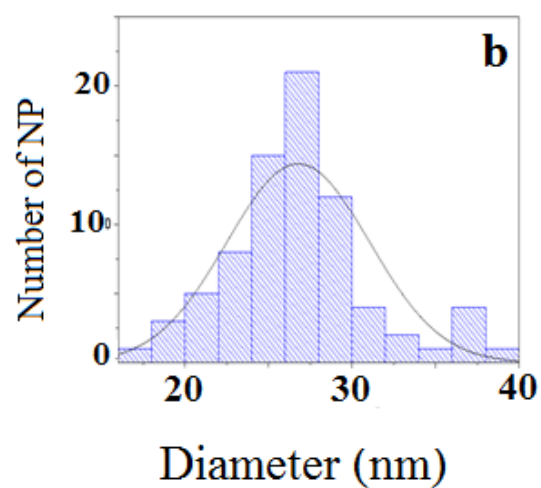

**Figure S-15** TEM Micrographs (a) Size distribution (b) of TPNP-Cd-2-H (top) and TPNP-Hg-2-H (bottom).

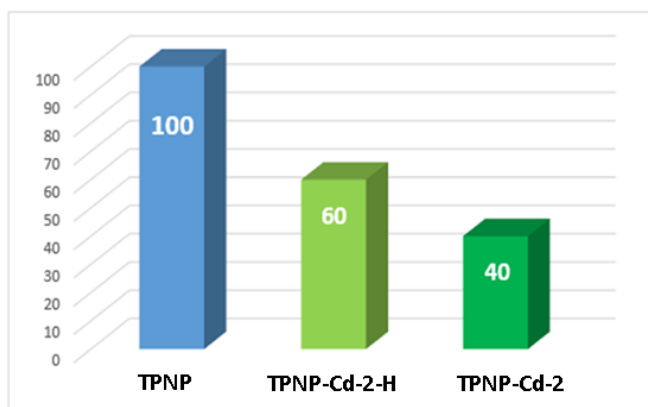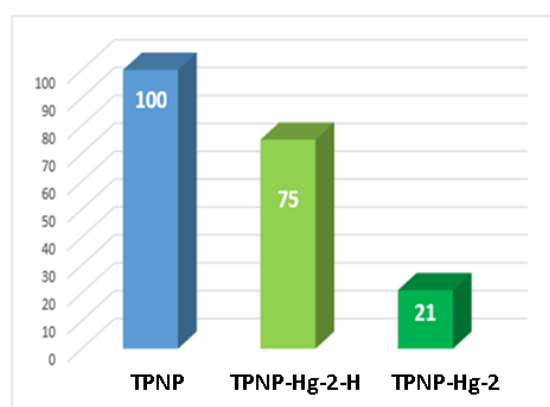

**Figure S-16** Relative area under the fluorescence signal at 720 nm corresponding to TPNP, TPNP-Cd-2-H and TPNP-Cd-2 (left) and to TPNP, TPNP-Hg-2-H and TPNP-Hg-2 (right).

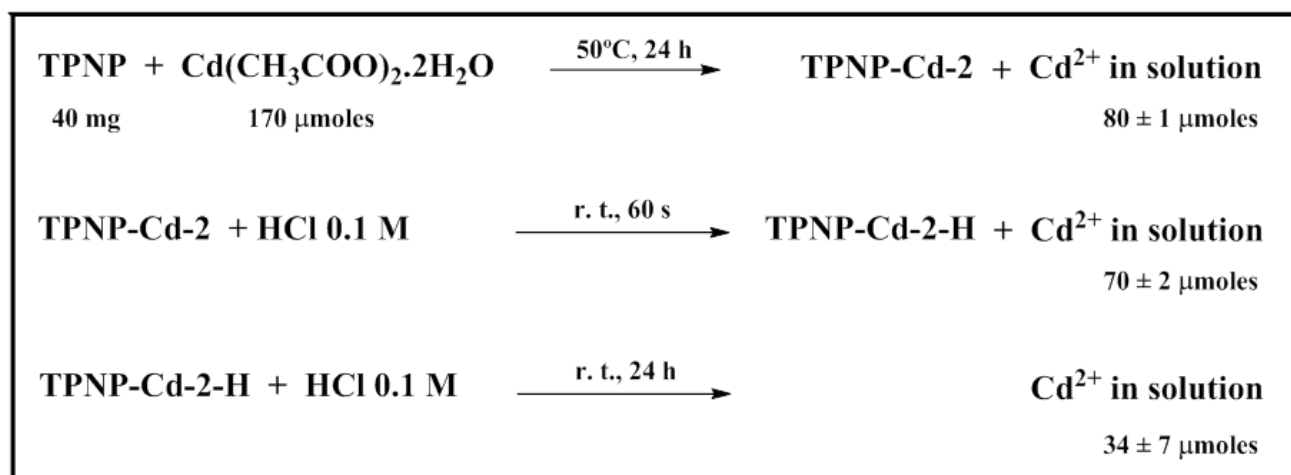

**Figure S-17** Monitoring of Cd<sup>2+</sup> abundance in solution and the incorporation /release of the cadmium (II) cation to/from titanium phosphate nanoparticles.

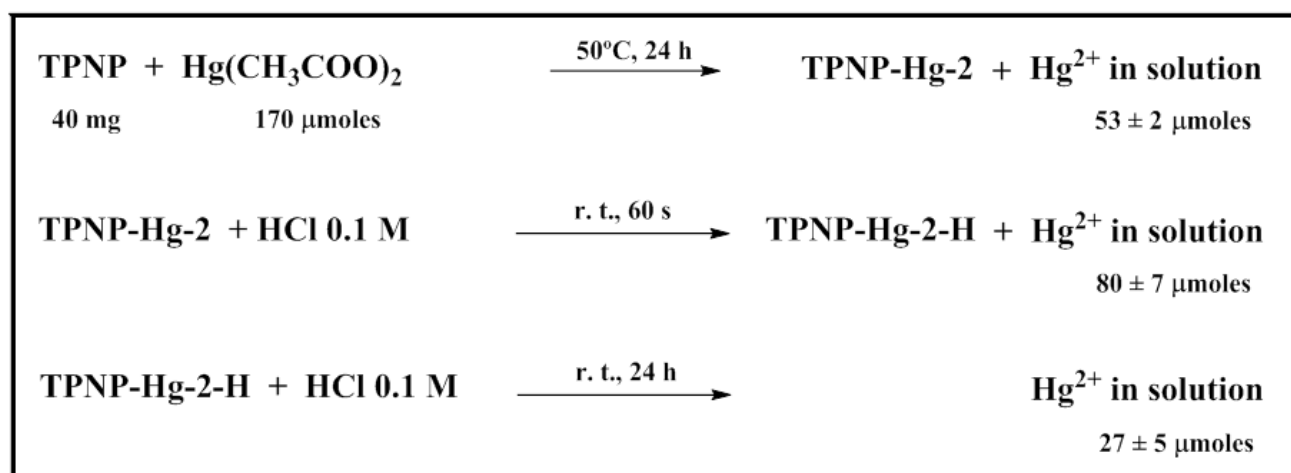

**Figure S-18** Monitoring of Hg<sup>2+</sup> abundance in solution and the incorporation/release of the mercury (II) cation to/from titanium phosphate nanoparticles.

**Table S-1.** Cross-polarization time constants.

| Phosphate group                                | δ <sub>iso</sub> , ppm | T <sub>1ρ</sub> ( <sup>1</sup> H) <sup>a</sup> , ms | T <sub>HP</sub> <sup>a</sup> , ms |
|------------------------------------------------|------------------------|-----------------------------------------------------|-----------------------------------|
| (PO <sub>4</sub> ) <sup>3-</sup>               | -27.9                  | ∞                                                   | 0.83 (0.06)                       |
| (HPO <sub>4</sub> ) <sup>2-</sup>              | -20.6                  | 9.6 (0.4)                                           | 0.83 (0.03)                       |
| (H <sub>2</sub> PO <sub>4</sub> ) <sup>-</sup> | -13.8                  | 6.2 (0.2)                                           | 0.78 (0.03)                       |
| (NaH <sub>2</sub> PO <sub>4</sub> )            | -6.0                   | 5.2 (0.4)                                           | 0.71 (0.06)                       |

<sup>a</sup>Standard deviation shown in parenthesis.
